# Supplementary material for: Mechanical Performance of 3D-Printed Polyethylene Fibers and Their Durability against Degradation
Source: MDPI journal article supplement (doi:10.3390/ma16145182), 2023-07-24
Supplement: s1 [file s1]

Article

# Mechanical Performances of 3D-Printed Polyethylene Fibers and Their Durability Against Degradation

Yao Xiao <sup>1,2,+</sup>, Shikai Zhang <sup>2,+</sup>, Jingyi Chen <sup>2,3</sup>, Baoling Guo <sup>1,3\*</sup> and Dong Chen <sup>2,3,4\*</sup>

<sup>1</sup> Department of Oncology, Longyan First Affiliated Hospital of Fujian Medical University, Longyan 364000, China; 11927061@zju.edu.cn

<sup>2</sup> College of Energy Engineering and State Key Laboratory of Clean Energy Utilization, Zhejiang University, Hang-zhou 310003, China; skzhang@zju.edu.cn

<sup>3</sup> John A. Paulson School of Engineering and Applied Sciences, Harvard University, Cambridge, MA 02138, USA; jchen1@g.harvard.edu

<sup>4</sup> Zhejiang Key Laboratory of Smart Biomaterials, College of Chemical and Biological Engineering, Zhejiang University, Hangzhou 310027, China; chen\_dong@zju.edu.cn

+These authors contribute equally to this work.

\* Correspondence: baolingguo@sina.com; chen\_dong@zju.edu.cn

## Supplementary Materials

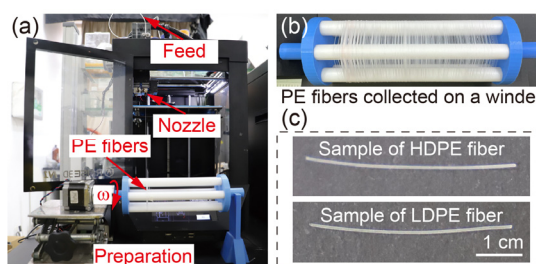

**Figure S1.** Preparation of PE fibers. (a) Experimental setup for the preparation of PE fibers. (b) PE fibers collected on a winder. (c) Samples of HDPE and LDPE fibers cut into 5 cm long.

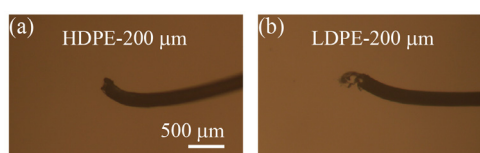

**Figure S2.** Fracture surface morphology of 3D-printed PE fibers after tensile fracture. (a) HDPE-200 μm. (b) LDPE-200 μm. The printer head temperature is 215 °C.

**Table S1.** Mechanical properties of HDPE and LDPE fibers with different diameters. The printer head temperature is 215 °C. HDPE and LDPE fibers with a diameter of 200 μm, 400 μm and 600 μm are prepared with a collecting speed of 11.6 cm/s, 3.1 cm/s and 1.2 cm/s, respectively. If not specified, Young's modulus is determined at 1% strain.

| Sample      | Tensile Strength<br>(MPa) | Tensile Strain (%) | Young's<br>Modulus (GPa) | Toughness<br>(MJ/m <sup>3</sup> ) |
|-------------|---------------------------|--------------------|--------------------------|-----------------------------------|
| HDPE-200 μm | 50.6±1.4                  | 426±30             | 0.976±0.073              | 171±20                            |
| HDPE-400 μm | 22.4±3.7                  | 809±93             | 0.867±0.042              | 178±32                            |
| HDPE-600 μm | 18.7±1.3                  | 917±62             | 0.639±0.088              | 172±17                            |
| LDPE-200 μm | 31.6±1.4                  | 824±63             | 0.364±0.096              | 195±28                            |
| LDPE-400 μm | 14.8±1.3                  | 1335±156           | 0.093±0.038              | 184±32                            |
| LDPE-600 μm | 8.51±0.87                 | 1073±100           | 0.071±0.005              | 89.0±7.6                          |

**Table S2.** Mechanical properties of HDPE and LDPE fibers printed at different printer head temperatures. The diameter of HDPE and LDPE fibers is about 200  $\mu\text{m}$ .

| Sample                  | Tensile Strength (MPa) | Tensile Strain (%) | Young's Modulus (GPa) | Toughness (MJ/m <sup>3</sup> ) |
|-------------------------|------------------------|--------------------|-----------------------|--------------------------------|
| HDPE- printed at 215 °C | 50.6 $\pm$ 1.4         | 426 $\pm$ 30       | 0.976 $\pm$ 0.073     | 171 $\pm$ 20                   |
| HDPE- printed at 235 °C | 40.2 $\pm$ 3.7         | 543 $\pm$ 50       | 0.760 $\pm$ 0.042     | 208 $\pm$ 30                   |
| HDPE- printed at 255 °C | 36.4 $\pm$ 4.0         | 570 $\pm$ 89       | 0.628 $\pm$ 0.101     | 213 $\pm$ 48                   |
| LDPE- printed at 215 °C | 31.6 $\pm$ 1.4         | 824 $\pm$ 63       | 0.364 $\pm$ 0.096     | 195 $\pm$ 28                   |
| LDPE- printed at 235 °C | 26.9 $\pm$ 2.4         | 952 $\pm$ 63       | 0.259 $\pm$ 0.031     | 200 $\pm$ 25                   |
| LDPE- printed at 255 °C | 25.3 $\pm$ 1.8         | 997 $\pm$ 99       | 0.224 $\pm$ 0.008     | 202 $\pm$ 30                   |

**Table S3.** Mechanical properties of HDPE and LDPE fibers before and after UV exposure. The printer head temperature is 215 °C. The diameter of HDPE and LDPE fibers is about 200  $\mu\text{m}$ . The samples are placed 8 cm under a UV lamp (395 nm, 18 W).

| Sample       | Tensile Strength (MPa) | Tensile Strain (%) | Young's Modulus (GPa) | Toughness (MJ/m <sup>3</sup> ) |
|--------------|------------------------|--------------------|-----------------------|--------------------------------|
| HDPE-0 h UV  | 50.6 $\pm$ 1.4         | 426 $\pm$ 30       | 0.976 $\pm$ 0.073     | 171 $\pm$ 20                   |
| HDPE-12 h UV | 46.6 $\pm$ 3.4         | 380 $\pm$ 42       | 0.968 $\pm$ 0.095     | 151 $\pm$ 30                   |
| HDPE-24 h UV | 35.2 $\pm$ 6.0         | 332 $\pm$ 83       | 0.691 $\pm$ 0.048     | 111 $\pm$ 36                   |
| HDPE-48 h UV | 33.9 $\pm$ 3.8         | 324 $\pm$ 29       | 0.630 $\pm$ 0.148     | 113 $\pm$ 21                   |
| LDPE-0 h UV  | 31.6 $\pm$ 1.4         | 824 $\pm$ 63       | 0.364 $\pm$ 0.096     | 195 $\pm$ 28                   |
| LDPE-12 h UV | 30.3 $\pm$ 1.8         | 807 $\pm$ 32       | 0.283 $\pm$ 0.008     | 180 $\pm$ 7                    |
| LDPE-24 h UV | 20.8 $\pm$ 2.1         | 621 $\pm$ 93       | 0.041 $\pm$ 0.012     | 101 $\pm$ 26                   |
| LDPE-48 h UV | 17.3 $\pm$ 4.1         | 531 $\pm$ 90       | 0.030 $\pm$ 0.012     | 75.5 $\pm$ 24.3                |

**Table S4.** Mechanical properties of HDPE and LDPE fibers before and after thermal degradation. The printer head temperature is 215 °C. The diameter of HDPE and LDPE fibers is about 200 µm. HDPE and LDPE samples are baked in an oven of 100 °C.

| Sample          | Tensile Strength<br>(MPa) | Tensile Strain (%) | Young's<br>Modulus (GPa) | Toughness<br>(MJ/m <sup>3</sup> ) |
|-----------------|---------------------------|--------------------|--------------------------|-----------------------------------|
| HDPE-0 h 100°C  | 50.6 ± 1.4                | 426 ± 30           | 0.976 ± 0.073            | 171 ± 20                          |
| HDPE-12 h 100°C | 47.0 ± 5.5                | 363 ± 73           | 0.751 ± 0.161            | 147 ± 35                          |
| HDPE-24 h 100°C | 43.5 ± 4.0                | 289 ± 26           | 0.704 ± 0.132            | 125 ± 36                          |
| LDPE-0 h 100°C  | 31.6 ± 1.4                | 824 ± 63           | 0.364 ± 0.096            | 195 ± 28                          |
| LDPE-12 h 100°C | 19.8 ± 4.3                | 615 ± 94           | 0.122 ± 0.009            | 113 ± 29                          |
| LDPE-24 h 100°C | 18.6 ± 1.0                | 386 ± 33           | 0.102 ± 0.067            | 62.3 ± 5.7                        |

**Disclaimer/Publisher's Note:** The statements, opinions and data contained in all publications are solely those of the individual author(s) and contributor(s) and not of MDPI and/or the editor(s). MDPI and/or the editor(s) disclaim responsibility for any injury to people or property resulting from any ideas, methods, instructions or products referred to in the content.
